# Supplementary material
Source: PubMed Central journal article supplement (PMC5461545)
Supplement: 10.1074_M116.066803_mcp.M116.066803-2.pdf [file 10.1074_M116.066803_mcp.M116.066803-2.pdf]

## Supplementary Table S2

Statistics of underlying LC-MS runs together with the corresponding triggered MS-Scans and PEAKS database searches of HeLa lysate digested with trypsin, LysC and neprosin.

| Sample                | HeLa + Trypsin        |                      |                      | HeLa + LysC           |                   |                   | HeLa + Neprosin       |                                                    |                                                    |
|-----------------------|-----------------------|----------------------|----------------------|-----------------------|-------------------|-------------------|-----------------------|----------------------------------------------------|----------------------------------------------------|
| Cleavage              | None                  | P1: K, R<br>P1': Any | P1: K, R<br>P1': Any | None                  | P1: K<br>P1': Any | P1: K<br>P1': Any | None                  | P1: P, A<br>P1': not P<br>And P1: D<br>with P1': P | P1: P, A<br>P1': not P<br>And P1: D<br>with P1': P |
| Nonspecific cleavage  | Both ends             | One end              | None                 | Both ends             | One end           | None              | Both ends             | One end                                            | None                                               |
| Missed cleavages      | 100                   | 3                    | 2                    | 100                   | 3                 | 2                 | 100                   | 7                                                  | 7                                                  |
| Usage                 | -                     | Proteome analysis    | PTM analysis         | -                     | Proteome analysis | PTM analysis      | -                     | Proteome analysis                                  | PTM analysis                                       |
| Database              | Homo sapiens          | Homo sapiens         | Homo sapiens         | Homo sapiens          | Homo sapiens      | Homo sapiens      | Homo sapiens          | Homo sapiens                                       | Homo sapiens                                       |
| TIC                   | 4.3 * 10 <sup>9</sup> |                      |                      | 2.6 * 10 <sup>9</sup> |                   |                   | 3.7 * 10 <sup>9</sup> |                                                    |                                                    |
| # MS scans            | 13014                 |                      |                      | 11795                 |                   |                   | 10758                 |                                                    |                                                    |
| # MS/MS scans         | 60859                 |                      |                      | 48219                 |                   |                   | 63308                 |                                                    |                                                    |
| # CID spectra         | 51877                 |                      |                      | 34304                 |                   |                   | 39317                 |                                                    |                                                    |
| # ETD spectra         | 8982                  |                      |                      | 13915                 |                   |                   | 23991                 |                                                    |                                                    |
| # PSMs                | 27798                 | 31388                | 26395                | 19802                 | 22336             | 17248             | 11538                 | 12975                                              | 10504                                              |
| Total conversion rate | 46 %                  | 52 %                 | 44 %                 | 41 %                  | 46 %              | 36 %              | 18 %                  | 20 %                                               | 17 %                                               |
| CID conversion rate   | 46 %                  | 52 %                 | 43 %                 | 38 %                  | 44 %              | 34 %              | 15 %                  | 17 %                                               | 13 %                                               |
| ETD conversion rate   | 50 %                  | 54 %                 | 48 %                 | 50 %                  | 55 %              | 44 %              | 24 %                  | 28 %                                               | 23 %                                               |
| # peptide sequences   | 22298                 | 25240                | 20814                | 14988                 | 16955             | 12628             | 7879                  | 8765                                               | 6997                                               |
| # unique cleavages    | 39167                 | -                    | -                    | 25224                 | -                 | -                 | 10713                 | -                                                  | -                                                  |
| # protein groups      | 3214                  | 3505                 | 3433                 | 2510                  | 2826              | 2715              | 1617                  | 1729                                               | 1644                                               |
