# Supplementary material
Source: PubMed Central journal article supplement (PMC5461545)
Supplement: 10.1074_M116.066803_mcp.M116.066803-6.pdf [file 10.1074_M116.066803_mcp.M116.066803-6.pdf]

### Supplementary Table S6

Identified histone isoforms in a HeLa digest using trypsin, LysC and neprosin. Only isoforms for which at least one unique peptide was found are shown. Black dots indicate that the corresponding histone was post-translationally modified.

| Histone isoform                  | Sequence coverage [%] |      |          |
|----------------------------------|-----------------------|------|----------|
|                                  | Trypsin               | LysC | Neprosin |
| H1.0                             |                       | 5    |          |
| H1.2                             | 23 •                  | 27 • |          |
| H1x                              | 23                    | 39   |          |
| H2A type 1-J                     | 33                    | 47   |          |
| H2A type 1-H                     |                       |      | 96 •     |
| H2A type 2-B                     | 18                    |      |          |
| H2A type 2-C                     |                       |      | 96 •     |
| H2A.J                            |                       | 47   |          |
| H2A.V                            |                       |      | 52       |
| H2AX                             |                       |      | 42 •     |
| H2A.Z                            | 31                    | 28   | 52       |
| H2B type 1-H                     | 48                    |      |          |
| H2B type 1-J                     | 48                    | 34   | 22       |
| H2B type 1-L                     |                       |      | 29 •     |
| H2B type 1-M                     |                       | 34   |          |
| H3.1                             | 20 •                  | 15   | 30       |
| H3.1t                            |                       |      | 39 •     |
| H3.2                             |                       |      | 30       |
| H4                               | 52                    | 77 • | 50 •     |
| Average sequence coverage [%]    | 33                    | 35   | 49       |
| # of identified histone isoforms | 9                     | 10   | 11       |
